# Supplementary material for: Dynamic changes in the subcellular distribution of the tobacco ROS-producing enzyme RBOHD in response to the oomycete elicitor cryptogein
Source: PubMed Central journal article supplement (PMC4144778; doi:10.1093/jxb/eru265), 2014-07-01
Supplement: supp_eru265_jexbot122317_file001.pdf [file supp_eru265_jexbot122317_file001.pdf]

*Journal of Experimental Botany*

**Subcellular localization and dynamics of the tobacco ROS-producing enzyme RBOHD upon cryptogein elicitation**

Elodie Noirot, Christophe Der, Jeannine Lherminier, Franck Robert, Pavla Moricova, Kiên Kiêu, Nathalie Leborgne-Castel, Françoise Simon-Plas, and Karim Bouhidel

```

RBOHD1      MQNSENHHPHHQHHSDETEIIGNDRASYSGPLSGPLNKRGGKKSARFNIPESDITGTSVG 60
RBOHD2      MQNSENHHPHHQHHSDETEIIGNDRASYSGPLSGPLNKRGGKKSARFNIPESDITGTSVG 60
*****:*****

RBOHD1      TGGKSNDDAYVEITLVDREDSVAVHSVKTAGGDDVEDPELALLAKGLEKKSTLGSSLVRN 120
RBOHD2      TGAKNDDAYVEITLVDREDSVAVHSVKTAGGDDVEDPELALLAKGLEKKSTLGSSLVRN 120
** .*****

RBOHD1      ASSRIRQVSQELRRLASLNKRPIPTGRFDRNKSAAAHALKGLKFI SKTDGGAGWAAVEKR 180
RBOHD2      ASSRIRQVSQELRRLASLNKRPIPTGRFDRNKSAAAHALKGLKFI SKTDGGAGWAAVEKR 180
*****

RBOHD1      FDEITASTTGLLPRAKFGECIGMKNESKEFAVELYDALARRRNITTD SINKAQLKEFWDQ 240
RBOHD2      FDEITASTTGLLPRAKFGECIGMKNESKEFAVELYDALARRRNITTD SINKAQLKEFWDQ 240
*****

RBOHD1      VADQSFDSRLQTFDFMVDKADGRITEEVREIIGLSASANRLSTIQKQADEYAAMIMEE 300
RBOHD2      VADQSFDSRLQTFDFMVDKADGRITEEVREIIGLSASANRLSTIQKQADEYAAMIMEE 300
*****

RBOHD1      LDPNNLGYIMIENLEMLLLQAPNQSVQRGGESRNL SQMLSQKLKHTQERNPIVRWYKSF 360
RBOHD2      LDPNNLGYIMIENLEMLLLQAPNQSVQRGGESRNL SQMLSQKLKHTQERNPIVRWYKSF 360
*****

RBOHD1      YFLLDNWQRVWVLLWIGIMAGLFTWKYIQYKEKAAYKVMGPCVCFAKGAAETLKLNMAI 420
RBOHD2      YFLLDNWQRVWVLLWIGIMAGLFTWKYIQYKEKAAYKVMGPCVCFAKGAAETLKLNMAI 420
*****

RBOHD1      ILLPVCRNITITWLRNKTRLGAAVPFDDNLFHKVIAVAIALGVGIHGLSHLTCDFPRLLN 480
RBOHD2      ILLPVCRNITITWLRNKTRLGAAVPFDDNLFHKVIAVAIALGVGIHGLSHLTCDFPRLLN 480
** :*****

RBOHD1      ASEEEYEPMKYYFGDQPESYWWFIKGVGVTGIIMVVLMAIAFTLATPWFRNRVSLPKP 540
RBOHD2      ASEEEYEPMKYYFGDQPESYWWFIKGVGVTGIIMVVLMAIAFTLATPWFRNRVSLPKP 540
*****

RBOHD1      FHKLTFGNFVYSHHLFVIVYTLFIVHGEKLYITKDWKRTTWMYLTIPILYASERLIR 600
RBOHD2      FHKLTFGNFVYSHHLFVIVYTLFIVHGEKLYITKDWKRTTWMYLTIPILYASERLIR 600
*****

RBOHD1      AFRSSIKAVKILKVAVYPGNVLAHMSKPPQGYKYKSGQYMFVNCAAVSPFEWHPFSITSA 660
RBOHD2      ALRSSIKAVKILKVAVYPGNVLAHMSKPPQGYKYKSGQYMFVNCAAVSPFEWHPFSITSA 660
* :*****

RBOHD1      PGDDYLSVHIRTLGDWTRQLKTVFSEVCQPPNGKSGLLRADYLGGENNPNFPRVLIDGP 720
RBOHD2      PGDDYLSVHIRTLGDWTRQLKTVFSEVCQPPNGKSGLLRADYLGGENNPNFPRVLIDGP 720
*****

RBOHD1      YGAPAQDYKKYEVVLLVGLGIGATPMISIVKDIVNNMKAMDEEENSLEDGHNMMAPNSS 780
RBOHD2      YGAPAQDYKKYEVVLLVGLGIGATPMISIVKDIVNNMKAMDEEENSLENGDNNMAQNSS 780
*****:*.****

RBOHD1      PNIAKNKGNKSGSASGNNFNTRRAYFYWVTREQGSFDWFKGIMNEAAEMDHKGVIEHMN 840
RBOHD2      PNIAQKRGKSDSASGRNNFNTRRAYFYWVTREQGSFDWFKGIMNEAAEMDHKGVIEHMN 840
*****:*.****

RBOHD1      YCTSVYEEGDARSALITMLQSLHHAKNGVDIVSGTRVKSHFAKPNWRNVYKR IALNHPDA 900
RBOHD2      YCTSVYEEGDARSALITMLQSLHHAKNGVDIVSGTRVKSHFAKPNWRNVYKR IALNHPDA 900
*****:

RBOHD1      KVGVFYCGAPALTKELRQHALLDFSHKTSTKFDHKNF 938
RBOHD2      KVGVFYCGAPALTKELRQHALLDFSHKTSTKFDHKNF 938
*****

```

**Supplementary Fig. S1.** Alignment of RBOHD1 and RBOHD2 amino acid sequences. Alignment was realized using ClustalW (Larkin et al., 2007). Fourteen amino acid differences are found in the two tobacco genes.

**Larkin MA, Blackshields G, Brown NP, Chenna R, McGettigan PA, McWilliam H, Valentin F, Wallace IM, Wilm A, Lopez R, et al. 2007. Clustal W and Clustal X version 2.0. *Bioinformatics*. 23, 2947-2948.**

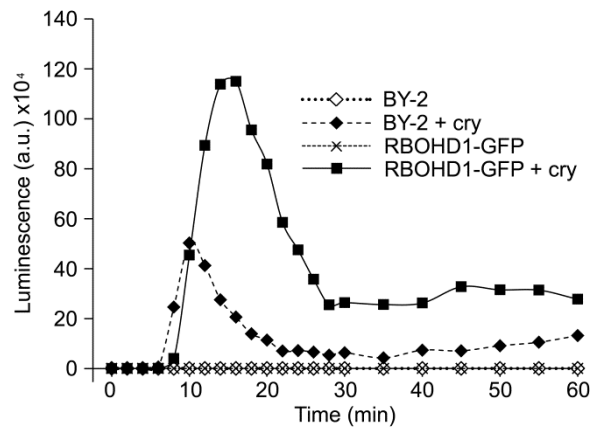

**Supplementary Fig. S2.** Kinetics of ROS production upon elicitation by cryptogein. ROS burst was measured in wild-type and *NtrbohD1*-expressing BY-2 cells by chemiluminescence (a.u.: arbitrary units). Kinetics is representative of 3 independent experiments.

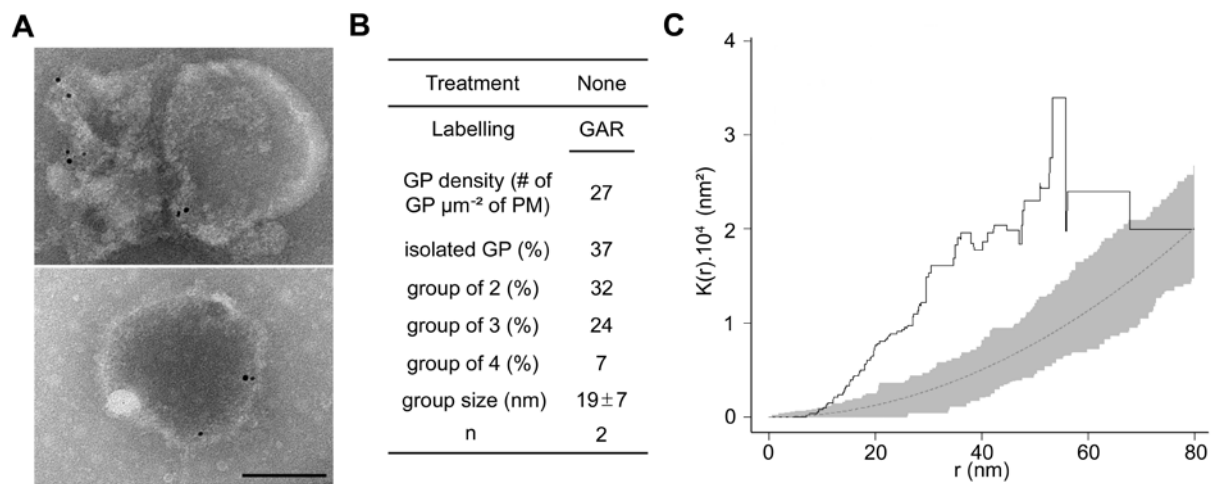

**Supplementary Fig. S3.** RBOHD-GFP protein forms clusters in the plasma membrane. (A) Representative transmission electron micrographs of PM vesicles from RBOHD-GFP-expressing cells and labelled with anti-GFP antibody and secondary IgG coupled to GPs of 5 nm (GAR). (Scale bar = 100 nm). (B) Labelling characteristics of PM vesicles. n = number of experiments. (C) Ripley's K-function analysis of RBOHD-GFP distribution on PM vesicles. Black line: sample  $K(r)$ , dotted line: theoretical Poisson  $K(r)$ , grey area: 99% Poisson simulation interval.

### Supplementary Table S1. Primers used in this study

#### Cloning primers

| Primer name    | Sequence                                                  |
|----------------|-----------------------------------------------------------|
| attB1-NoxD5    | 5'-GGGGACAAGTTTGTACAAAAAAGCAGGCTAATGCAAAATTCGGAAAAT       |
| attB2-NoxD1-2  | 5'-GGGGACCACTTTGTACAAGAAAGCTGGGTCAACCTGTGTCCTTAGCTG       |
| attB2-NoxD2-1  | 5'-GGGGACCACTTTGTACAAGAAAGCTGGGTATAGGGAGAGGTGGTAGATTC     |
| attB1-NtrbohD4 | 5'-GGGGACAAGTTTGTACAAAAAAGCAGGCTTCGTTTATTTAGGGCAAGTT      |
| attB2-NtrbohD1 | 5'-GGGGACCACTTTGTACAAGAAAGCTGGGTAGAAATTTTCTTTATGGAATCAAAC |

#### qRT-PCR primers

| Gene name     | Sequence                                                                    |
|---------------|-----------------------------------------------------------------------------|
| EF-1a         | Forward 5'-TGAGATGCACCACGAAGCTC<br>Reverse 5'-CCAACATTGTCACCAGGAAGTG        |
| L25           | Forward 5'-CCCCTCACCACAGAGTCTGC<br>Reverse 5'-AAGGGTGTTGTTGTCCTCAATCTT      |
| PP2A          | Forward 5'-GTGAAGCTGTAGGGCCTGAGC<br>Reverse 5'-CATAGGCAGGCACCAAATCC         |
| <i>RBOHD1</i> | Forward 5'-CATCAAAACAGCTAAGGACACAG<br>Reverse 5'-GTACACAATAGGGAGAGTTGGTAGAC |
| <i>RBOHD2</i> | Forward 5'-AGATACCAAGGGAATTAAGAATGTG<br>Reverse 5'-GGCACCCATCAAAGAGG        |
